# Supplementary material for: CMIP Promotes Proliferation and Metastasis in Human Glioma
Source: Hindawi journal article supplement (doi:10.1155/2017/5340160), 2017-01-01

Fig. S1

A172

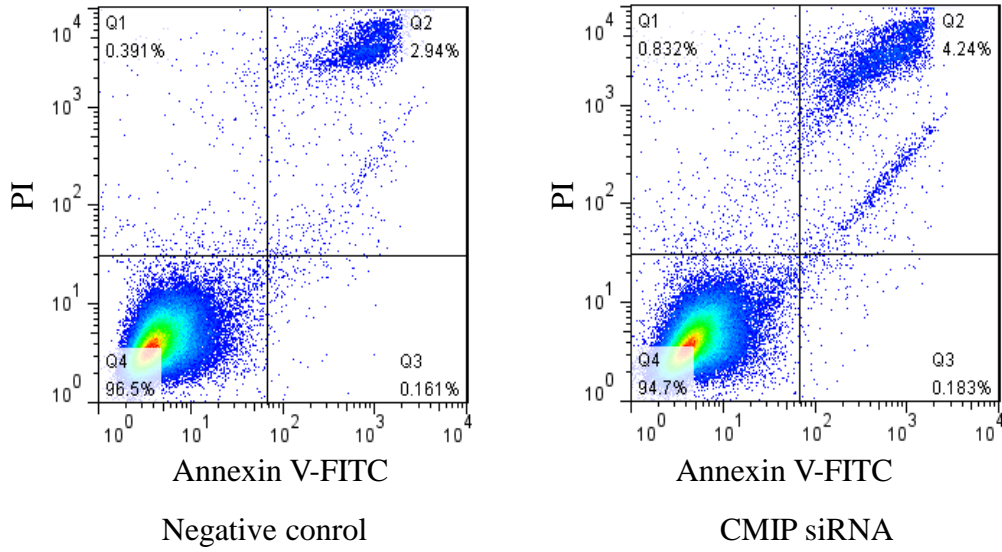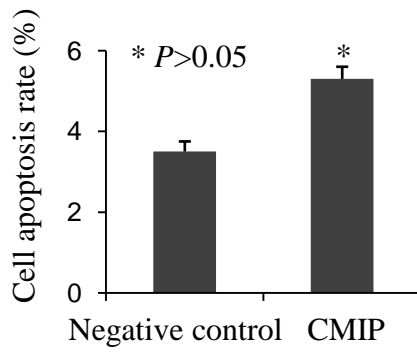

Supplement: f1 [file 5340160.f1.pdf]
